# Supplementary material for: Exploring the Relationship between Mumps and Meteorological Factors in Shandong Province, China Based on a Two-Stage Model
Source: MDPI journal article supplement (doi:10.3390/ijerph181910359), 2021-10-01
Supplement: s1 [file s1]

## Tables

**Table S1** Geography, population, and socioeconomic variables in Shandong Province and 17 cities

| City              | Longitude | latitude | Population density<br>(person/km2) | Proportion of students*<br>(/10000) | Urbanization rate | GDP per capita |
|-------------------|-----------|----------|------------------------------------|-------------------------------------|-------------------|----------------|
| Jinan             | 117.13    | 36.66    | 915                                | 1160                                | 70.53             | 98967          |
| Qingdao           | 120.39    | 36.07    | 823                                | 1093                                | 72.57             | 119357         |
| Zibo              | 118.06    | 36.82    | 789                                | 1082                                | 70.26             | 101781         |
| Zaozhuang         | 117.33    | 34.82    | 859                                | 1333                                | 57.32             | 59110          |
| Dongyong          | 118.59    | 37.45    | 261                                | 783                                 | 67.75             | 177376         |
| Yantai            | 121.45    | 37.47    | 512                                | 844                                 | 63.66             | 103706         |
| Weifang           | 119.17    | 36.71    | 580                                | 1091                                | 59.95             | 62592          |
| Jining            | 116.59    | 35.42    | 749                                | 1130                                | 57.12             | 55595          |
| Tai'an            | 117.09    | 36.21    | 727                                | 973                                 | 60.63             | 63555          |
| Weihai            | 117.23    | 31.83    | 487                                | 887                                 | 66.46             | 123301         |
| Rizhao            | 119.53    | 35.42    | 544                                | 1062                                | 58.65             | 68848          |
| Laiwu             | 117.67    | 36.21    | 613                                | 1024                                | 62.58             | 65122          |
| Linyi             | 118.36    | 35.11    | 614                                | 1345                                | 57.4              | 41372          |
| Dezhou            | 116.37    | 37.44    | 560                                | 1110                                | 55.57             | 54197          |
| Liaocheng         | 115.99    | 36.46    | 703                                | 1344                                | 50.34             | 50641          |
| Binzhou           | 117.23    | 31.83    | 427                                | 1032                                | 58.63             | 66970          |
| Heze              | 115.49    | 35.24    | 719                                | 1479                                | 49.05             | 32493          |
| Shandong Province |           |          | 634                                | 1157                                | 60.58             | 72851          |

\*: The proportion of students is the proportion of primary and secondary school students.

**Table S2** Spearman rank correlation analysis of meteorological, demographic and other factors and the incidence of mumps in Shandong Province from 2009 to 2017

|                                                              | Precip | Pres               | Wind              | Hum    | Sun    | Mean<br>Temp      | Min<br>Temp       | Max<br>Temp | Lon    | Lat    | Pop    | Student | Urban             | GDP    | Cases |
|--------------------------------------------------------------|--------|--------------------|-------------------|--------|--------|-------------------|-------------------|-------------|--------|--------|--------|---------|-------------------|--------|-------|
| Daily precipitation (mm)                                     | 1.00   |                    |                   |        |        |                   |                   |             |        |        |        |         |                   |        |       |
| Daily average atmospheric pressure (hPa)                     | -0.19* | 1.00               |                   |        |        |                   |                   |             |        |        |        |         |                   |        |       |
| Daily average wind speed (m/s)                               | 0.04*  | -0.11*             | 1.00              |        |        |                   |                   |             |        |        |        |         |                   |        |       |
| Daily average relative humidity (%)                          | 0.47*  | -0.16*             | -0.16*            | 1.00   |        |                   |                   |             |        |        |        |         |                   |        |       |
| Daily average sunshine hours (h)                             | -0.43* | -0.10*             | 0.10*             | -0.48* | 1.00   |                   |                   |             |        |        |        |         |                   |        |       |
| Daily average temperature (°C)                               | 0.15*  | -0.54*             | -0.13*            | 0.28*  | 0.18*  | 1.00              |                   |             |        |        |        |         |                   |        |       |
| Daily average minimum temperature (°C)                       | 0.23*  | -0.55*             | -0.09*            | 0.38*  | 0.06*  | 0.98*             | 1.00              |             |        |        |        |         |                   |        |       |
| Daily average maximum temperature (°C)                       | 0.09*  | -0.52*             | -0.18*            | 0.20*  | 0.26*  | 0.98*             | 0.93*             | 1.00        |        |        |        |         |                   |        |       |
| Longitude                                                    | 0.00   | 0.09*              | 0.03*             | -0.02* | -0.01* | 0.01 <sup>a</sup> | 0.04*             | -0.02*      | 1.00   |        |        |         |                   |        |       |
| Latitude                                                     | -0.01* | -0.07 <sup>a</sup> | -0.06*            | -0.13* | 0.04*  | 0.00              | -0.02*            | 0.02*       | 0.22*  | 1.00   |        |         |                   |        |       |
| Population density (Person/square kilometer)                 | 0.00   | -0.43*             | -0.10*            | -0.04* | -0.03* | 0.01              | 0.00              | 0.02*       | -0.24* | -0.07* | 1.00   |         |                   |        |       |
| Proportion of primary and secondary school students (/10000) | 0.02*  | 0.03*              | -0.29*            | 0.04*  | -0.06* | 0.08*             | 0.05*             | 0.12*       | -0.46* | -0.29* | 0.61*  | 1.00    |                   |        |       |
| Urbanization rate (%)                                        | 0.01a  | -0.24*             | 0.27*             | -0.09* | 0.01   | -0.03*            | 0.01 <sup>a</sup> | -0.08*      | 0.60*  | 0.31*  | 0.05*  | -0.57*  | 1.00              |        |       |
| GDP per capita (Yuan)                                        | 0.00   | -0.07*             | 0.26*             | -0.04* | -0.03* | -0.03*            | 0.02*             | -0.08*      | 0.59*  | 0.24*  | -0.27* | -0.77*  | 0.88*             | 1.00   |       |
| Number of cases                                              | 0.02*  | -0.14*             | 0.01 <sup>a</sup> | 0.03*  | 0.05*  | 0.07*             | 0.07*             | 0.08*       | -0.13* | -0.09* | 0.29*  | 0.22*   | 0.01 <sup>a</sup> | -0.07* | 1     |

Note: \*:  $P < 0.01$ ; <sup>a</sup>:  $P < 0.05$

**Table S3** Sensitivity analysis (relative risk RR)

|                                    | Daily average temperature (°C) |              |              |              |              |
|------------------------------------|--------------------------------|--------------|--------------|--------------|--------------|
|                                    | -12.6                          | -1.5         | 9.7          | 20.8         | 31.9         |
| Daily average temperature          |                                |              |              |              |              |
| df=2                               | 2.379                          | 1.612        | 1.138        | 0.879        | 0.731        |
| <b>df=3</b>                        | <b>2.429</b>                   | <b>1.804</b> | <b>1.227</b> | <b>0.820</b> | <b>0.760</b> |
| df=4                               | 2.225                          | 1.840        | 1.239        | 0.841        | 0.752        |
| df=5                               | 1.879                          | 1.791        | 1.181        | 0.823        | 0.778        |
| df=6                               | 2.425                          | 1.701        | 1.302        | 1.035        | 1.078        |
| df=7                               | 3.075                          | 1.671        | 1.262        | 0.981        | 0.981        |
| Daily average relative humidity    |                                |              |              |              |              |
| df=2                               | 2.441                          | 1.806        | 1.226        | 0.821        | 0.757        |
| <b>df=3</b>                        | <b>2.429</b>                   | <b>1.804</b> | <b>1.227</b> | <b>0.820</b> | <b>0.760</b> |
| df=4                               | 2.439                          | 1.808        | 1.228        | 0.821        | 0.763        |
| df=5                               | 2.450                          | 1.812        | 1.228        | 0.820        | 0.761        |
| df=6                               | 2.444                          | 1.813        | 1.229        | 0.819        | 0.760        |
| df=7                               | 2.441                          | 1.809        | 1.228        | 0.820        | 0.761        |
| Daily precipitation                |                                |              |              |              |              |
| df=2                               | 2.429                          | 1.804        | 1.227        | 0.820        | 0.760        |
| <b>df=3</b>                        | <b>2.429</b>                   | <b>1.804</b> | <b>1.227</b> | <b>0.820</b> | <b>0.760</b> |
| df=4                               | 2.429                          | 1.804        | 1.227        | 0.820        | 0.760        |
| df=5                               | 2.409                          | 1.088        | 1.227        | 0.820        | 0.760        |
| df=6                               | 2.357                          | 1.778        | 1.227        | 0.820        | 0.760        |
| df=7                               | 2.402                          | 1.793        | 1.227        | 0.820        | 0.760        |
| Daily average atmospheric pressure |                                |              |              |              |              |
| df=2                               | 2.473                          | 1.838        | 1.238        | 0.813        | 0.753        |
| <b>df=3</b>                        | <b>2.429</b>                   | <b>1.804</b> | <b>1.227</b> | <b>0.820</b> | <b>0.760</b> |
| df=4                               | 2.440                          | 1.805        | 1.226        | 0.823        | 0.768        |
| df=5                               | 2.432                          | 1.801        | 1.225        | 0.822        | 0.764        |
| df=6                               | 2.399                          | 1.792        | 1.225        | 0.822        | 0.767        |
| df=7                               | 2.392                          | 1.783        | 1.221        | 0.826        | 0.773        |
| Daily average sunshine hours       |                                |              |              |              |              |
| df=2                               | 2.423                          | 1.803        | 1.227        | 0.820        | 0.760        |
| <b>df=3</b>                        | <b>2.429</b>                   | <b>1.804</b> | <b>1.227</b> | <b>0.820</b> | <b>0.760</b> |
| df=4                               | 2.455                          | 1.814        | 1.229        | 0.820        | 0.760        |
| df=5                               | 2.429                          | 1.805        | 1.227        | 0.821        | 0.762        |

|                             |              |              |              |              |              |
|-----------------------------|--------------|--------------|--------------|--------------|--------------|
| df=6                        | 2.459        | 1.819        | 1.230        | 0.818        | 0.759        |
| df=7                        | 2.452        | 1.822        | 1.233        | 0.816        | 0.752        |
| Daily average<br>wind speed |              |              |              |              |              |
| df=2                        | 2.417        | 1.802        | 1.227        | 0.820        | 0.758        |
| <b>df=3</b>                 | <b>2.429</b> | <b>1.804</b> | <b>1.227</b> | <b>0.820</b> | <b>0.760</b> |
| df=4                        | 2.420        | 1.799        | 1.226        | 0.821        | 0.760        |
| df=5                        | 2.420        | 1.796        | 1.224        | 0.822        | 0.760        |
| df=6                        | 2.432        | 1.798        | 1.225        | 0.822        | 0.759        |
| df=7                        | 2.418        | 1.791        | 1.222        | 0.824        | 0.765        |
| Time variable               |              |              |              |              |              |
| df=6                        | 1.288        | 1.398        | 1.196        | 0.827        | 0.817        |
| <b>df=7</b>                 | <b>2.429</b> | <b>1.804</b> | <b>1.227</b> | <b>0.820</b> | <b>0.760</b> |
| df=8                        | 1.987        | 1.474        | 1.118        | 0.874        | 0.670        |
| df=9                        | 1.348        | 1.273        | 1.106        | 0.889        | 0.789        |
| Maximum lag<br>time         |              |              |              |              |              |
| df=14                       | 1.183        | 1.117        | 1.077        | 0.944        | 1.049        |
| df=21                       | 1.123        | 1.195        | 1.195        | 0.831        | 0.870        |
| <b>df=30</b>                | <b>2.429</b> | <b>1.227</b> | <b>1.227</b> | <b>0.820</b> | <b>0.760</b> |

## Figures

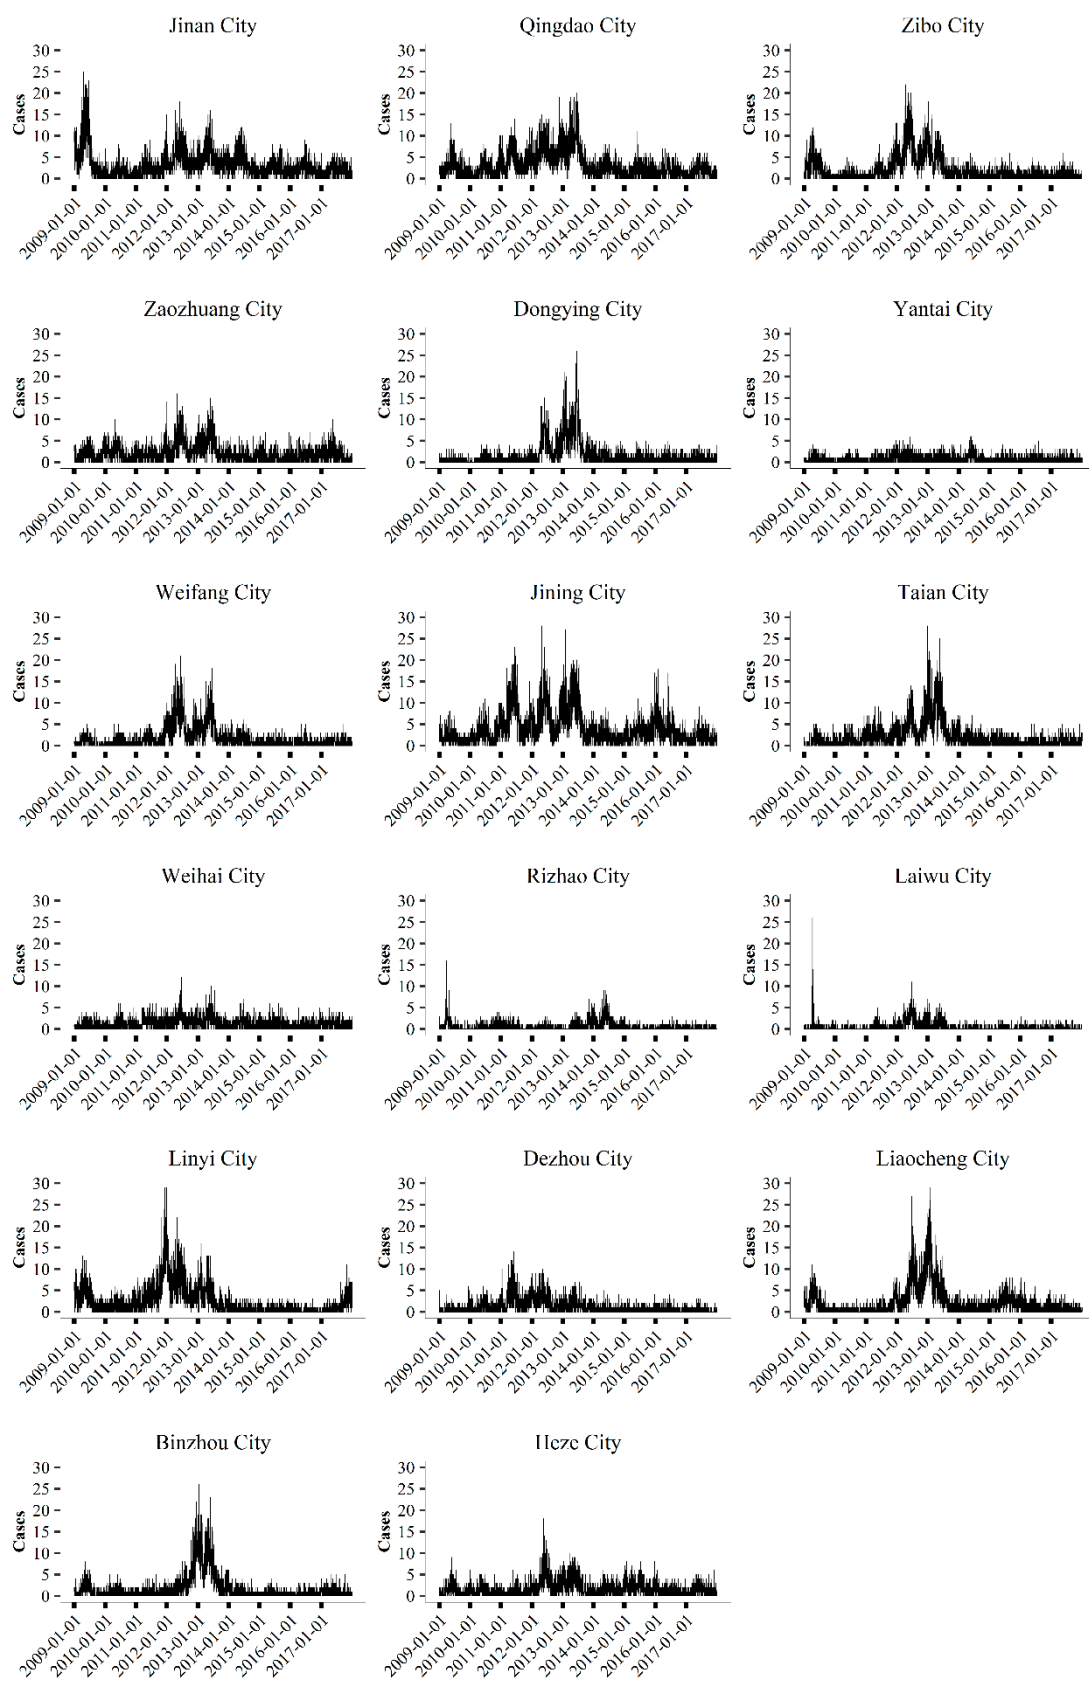

**Figure S1.** The daily cases of mumps from 2009 to 2017 in 17 cities, Shandong province.

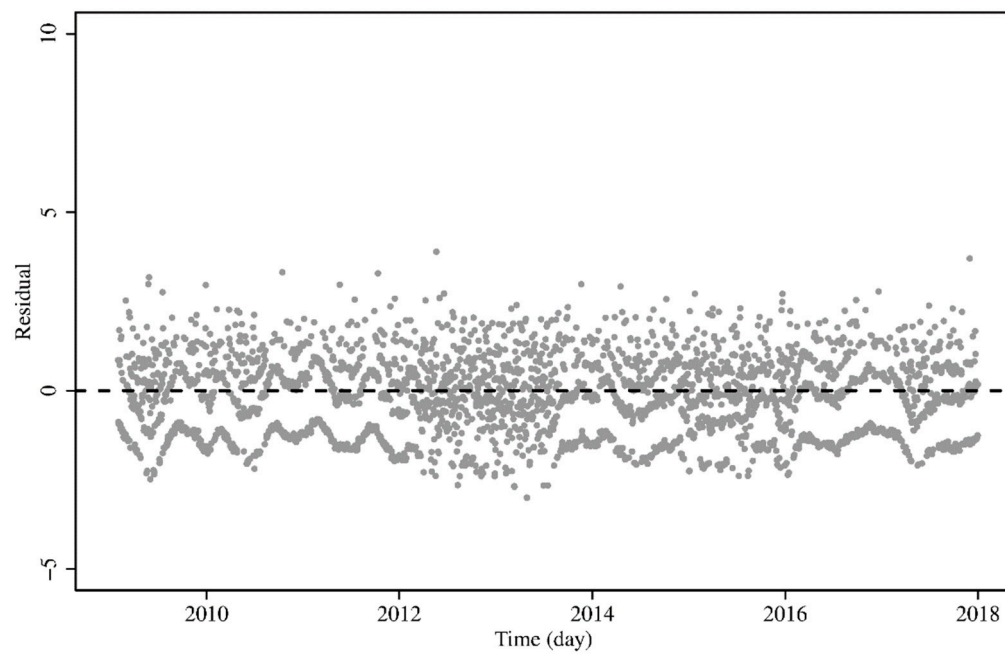

**Figure S2** The residual graph of DLNM.
